# Supplementary material
Source: PubMed Central journal article supplement (PMC3251657)
Supplement: NIHMS344172-supplement-supplementary_data.pdf [file NIHMS344172-supplement-supplementary_data.pdf]

# European Journal of Immunology

**Supporting Information**

**for**

**DOI 10.1002/eji.201141618**

**A clonal model for human CD8<sup>+</sup> regulatory T cells: Unrestricted contact-dependent killing of activated CD4<sup>+</sup> T cells**

Dan Hu, Xia Liu, Wanyong Zeng, Howard L. Weiner and Jerome Ritz

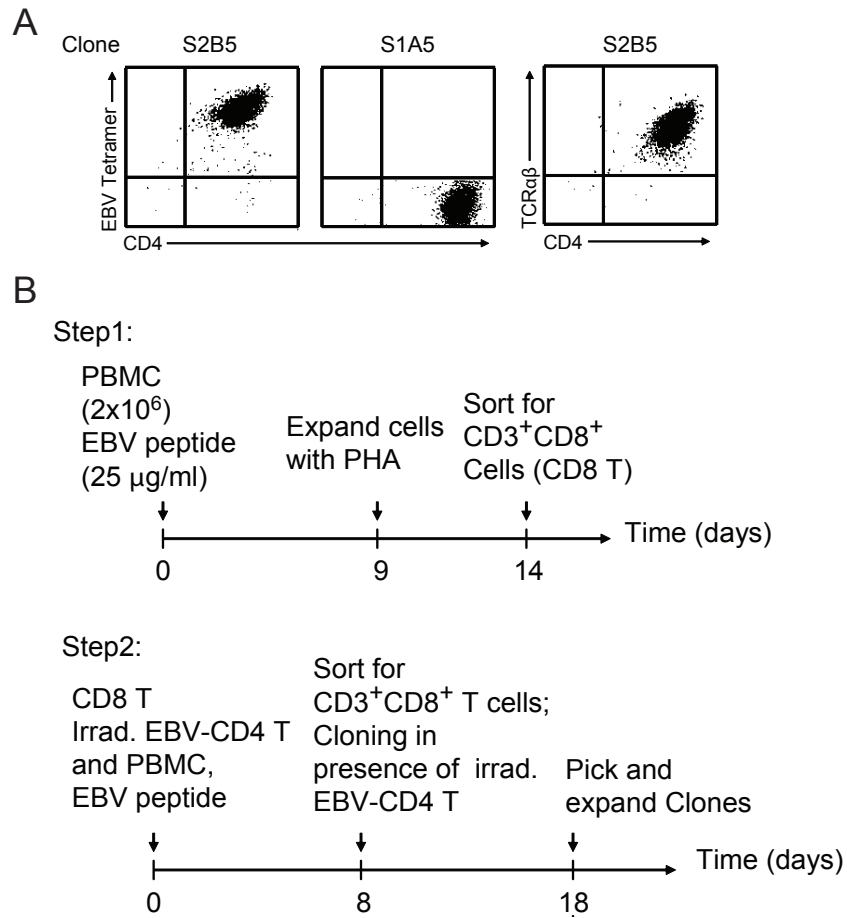

**Supporting Information Figure 1. EBV-specific CD4<sup>+</sup> T cell clones and strategy of isolating CD8<sup>+</sup> Treg cell clones.**

(A) EBV-specific CD4<sup>+</sup> T cell clones. CD4<sup>+</sup> T cell clones isolated from pEBV peptide-stimulated HLA-DR1<sup>+</sup> normal human PBMCs were analyzed for CD4 expression and binding to pEBV-presenting HLA-DR1 tetramer (EBV-Tetra) (y-axis). Data are from one experiment representative of four.

(B) Strategy and timeline for isolation of CD8<sup>+</sup> Treg cell clones. DR1-positive PBMCs were stimulated with pEBV (25 μg/ml). Peptide stimulated cells were expanded in the presence of PHA and feeder cells on day 9 followed by isolation of CD8<sup>+</sup> T cells on day 14. Isolated CD8<sup>+</sup> T cells were further stimulated with irradiated EBV-specific CD4<sup>+</sup> T cells in the presence of irradiated autologous PBMCs and pEBV (9 μg/ml). On day 8 of step 2, CD8<sup>+</sup> T cells were isolated and subcloned. Clones were expanded for further analysis.

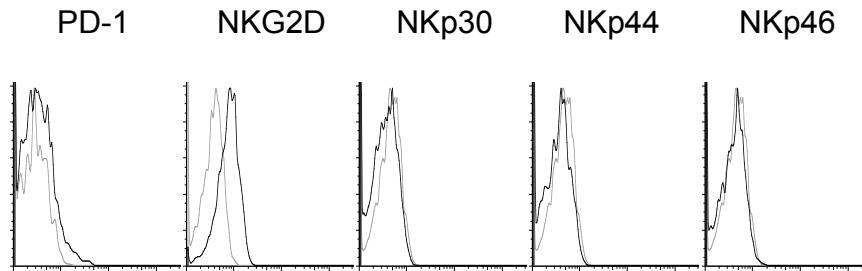

**Supporting Information Figure 2. Additional cell surface antigen expression analysis in CD8<sup>+</sup> Treg cell clones.**

CD8<sup>+</sup> Treg cell clones (1B3, 1E2, 1E8 and 1F3) were expanded via PHA stimulation for 8 and 12 days and harvested for flow cytometry analysis. Data are from one experiment representative of three. Black line indicates specific antibody staining and gray line indicates control.

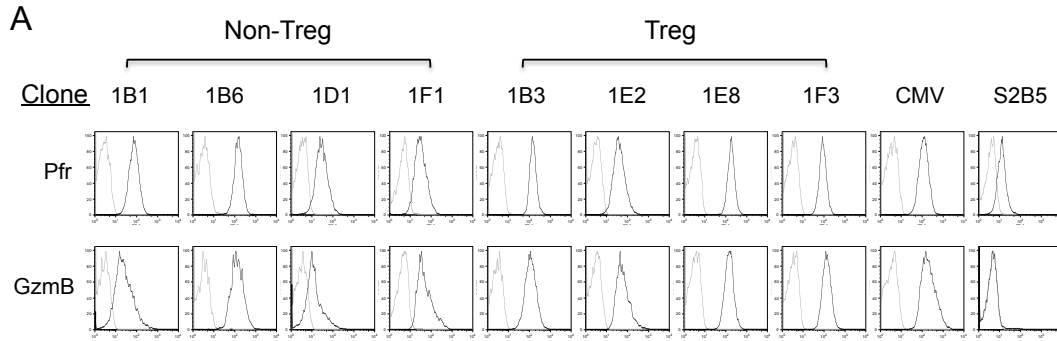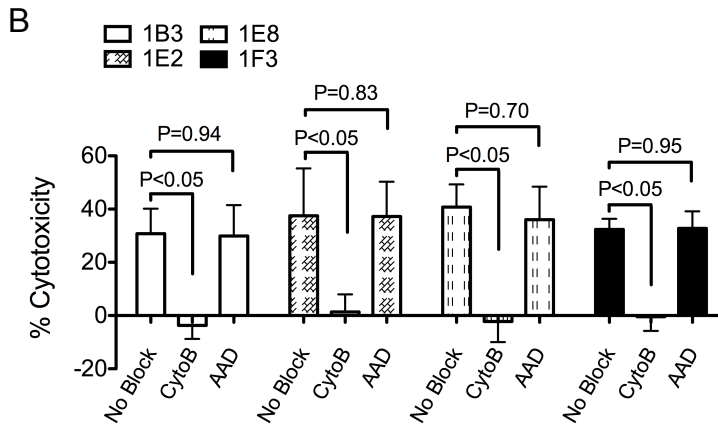

**Supporting Information Figure 3. CD8<sup>+</sup> Treg cell clones express granzyme B and perforin but its cytotoxicity is not blocked granzyme B inhibitor.**

(A) Intracellular staining of granzyme B (GzmB) and perforin (Pfr) in T cell clones. CMV: CMV specific CD8<sup>+</sup> CTL clone CMV66; S2B5, an EBV-specific CD4<sup>+</sup> T cell clone. Data are from one experiment representative of three. Black line indicates specific antibody staining and gray line indicates isotype control staining.

(B) Cytotoxicity mediated by CD8<sup>+</sup> Treg cells is resistant to granzyme B inhibitor. CytoTx assays were performed to assess the blocking effect of Cytochalasin B (CytoB, 10 µg/ml) and AAD-cmk (AAD, 50 µM), which were added to CD8<sup>+</sup> Treg cells first and then co-incubated with CD4<sup>+</sup> target cells for 4 hr. Results are shown as mean ± SD of data pooled from three independent experiments. P values were obtained via unpaired, two-tailed *t*-test.

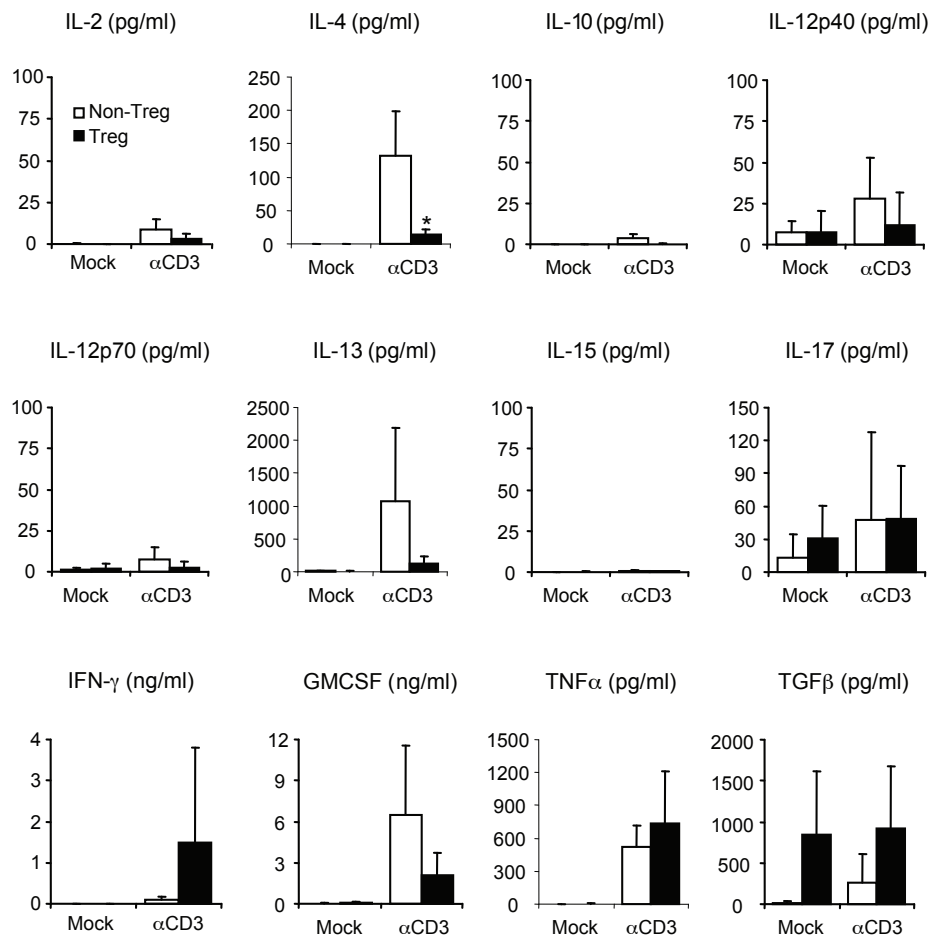

**Supporting Information Figure 4. Cytokine production of CD8<sup>+</sup> Treg cell clones.**

Cytokine secretion by CD8<sup>+</sup> T cell clones ( $1 \times 10^5$  cells per well) after over night culturing in the presence or absence of anti-CD3 IgE mAb (1  $\mu$ g/ml) was quantitated with Multiplex ELISA array. CD8<sup>+</sup> Treg cell clones, n=3; autologous non-Treg CD8<sup>+</sup> T cell clones, n=3. Results are shown as mean  $\pm$  SD. \*, P value < 0.05; without indications, P value > 0.05. P values were obtained via unpaired, two-tailed *t*-test.
